# Supplementary material for: A Meta-Analysis of Bacterial Communities in Food Processing Facilities: Driving Forces for Assembly of Core and Accessory Microbiomes across Different Food Commodities
Source: Microorganisms. 2023 Jun 14;11(6):1575. doi: 10.3390/microorganisms11061575 (PMC10304558; doi:10.3390/microorganisms11061575)
Supplement: Supplementary file 1 [file microorganisms-11-01575-s001.zip › microorganisms-2418678-Table S1 submitted.xlsx]

## Sheet: Overall
	Geographic regions	Food category	Surface	Major organisms	Nutrient level	How sampled	How analysed	Was any effort made for source tracking	Reference to biofilms	Keyword	DOI
1	USA, North America	RTE food -USA	deli slicers	Serratia	high	Sampled once at 8 different deli stores	Culture based and 16S	NA	Yes	Deli slicer Denaturing gradient gel electrophoresis Sanitation	https://doi.org/10.1016/j.foodcont.2014.02.027
				Stenotrophomonas
				Psychrobacter
				Aeromonas
				Pseudomonas
				Klebsiella
2	Belgium, Europe	RTE meal processing plant	Walls	Streptcoccaceae	low	Two visits within two months	Metagenomic 16s	NA	No	NA	https://doi.org/10.1128/AEM.03941-14
				Pseudomonas
				Moraxellaceae
				Staphylococcus
				Leuconostoc
				Sphingomonadaceae
				Enterobacteriaceae
			rotating belt of dicer	Lactobacillus	high
				Streptcoccaceae
			pasta cooling vessel	Leuconostoc	high
				Brochothrix
				Lactococcus
				Streptcoccaceae
				Sphingomonadaceae
				Enterobacteriaceae
				Moraxellaceae
				Pseudomonas
3	Austria, Europe	Meat processinf plant	Water hose	Flavobacterium	low	Two times on different surfaces	Metagenomic 16S	NA	Yes	Matrix analysis Brochothrix Pseudomonas Psychrobacter	https://doi.org/10.1016/j.ijfoodmicro.2020.108668
				Microbacterium
				Rhodococcus
				Stenotrophomonas
			Drain	Brochothrix	high
				Pseudomonas
				Psychrobacter
			Cutter	Brochothrix	high
				Carnobacterium
				Pseudomonas
				Psychrobacter
				Acinetobacter
4	Ireland, Europe	meat production facility	Drain	L. monocytogenes	high	6 samples within three days	Metagenomic 16S	Processing environment	Yes	NA	doi:10.1128/AEM.00468-14
				L. welshimeri
				L. innocua
				Prevotella
				Janthinobacterium
				Enterococcus
				Rhodococcus
5	Norway, Europe	Meat Abattoir	Joystick flaying equipment	Acinetobacter	high	One time from different surfaces	Culture based and 16S	Processing environment	Yes	Listeria monocytogenes; Meat Bacteria; Desiccation; Biofilm; Disinfection	http://dx.doi.org/10.4236/aim.2013.33037
				Enterobacter
			Platform evisceration	Acinetobacter	high
			Splitting saw	Aerococcus	high
				Serratia
			Knife flaying	Citrobacter	high
				Enterobacter
				Kocuria
				Pseudomonas
			Evisceration gutter	Staphylococcus	high
			Platform splitting	Staphylococcus	high
6	Spain, Europe	pork cutting industry	Drain	Pseudomonas	high	Ten sampling dates within 1.5 years	Culture based and 16S	Processing environment	Yes	NA	https://doi.org/10.1186/s40168-021-01131-9
				Acinetobacter
				Psychrobacter
				Enterococcus
			floor	Proteus	unknown
				Citrobacter
				Staphylococcus
				Enterococcus
				Pseudomonas
7	Canada, North America	beef fabrication facility - Canada	conveyor belts - non food contact surface	Acinetobacter	low	9 sampling times	Culture based and 16S	Processing environment	No	Conveyor belt Contamination; Sanitation; Microbial ecology; Active drying	https://doi.org/10.1016/j.foodcont.2017.09.017
				Yersinia
				Stenotrophomonas
				Carnobacterium
				Hafnia
				Pseudomonas
				Xanthomonas
				Streptococcus
				Enterobacter
				Aeromonas
				Brochothrix
8	New Zealand, Oceania	Lamb boning room-new zealand	Intralox™ conveyor belting system	Pseudomonas	high	one time at 5 hinge sites	Both	Processing environment	Yes	Bacteria; 16S cloning; Diversity	https://doi.org/10.1016/j.ijfoodmicro.2006.01.008
				Serratia
				Microbacterium
				Sphingomonas
9	France, Europe	Beef processing plant	meat contact surface	Staphylococcus capitis	high	One time	Culture based and 16S	Processing environment	Yes	E. coli O157:H7, Cleaning and disinfection, Microbial ecology, Dual-organism biofilms	https://doi.org/10.1016/j.ijfoodmicro.2009.04.028
				Micrococcus caseolyticus
				Shewanella putrefaciens
				Aerococcus viridans
			Coveyor belts	Staphylococcus xylosus	high
				Kocuria varians
				Arthrobacter
			cutting board	Staphylococcus sciuri	high
				Bacillus pumilus
				Brevibacterium
			floor	Pseudomonas putida	unknow
				Pseudomonas anguilliseptica
				Comamonas testosteron
				Staphylococcus xylosus
				Bacillus pumilus
			wall	Bacillus sublitis	low
10	Finland, Europe	Manufacture of Vacuum-Packaged Cooked Sausages	packaging belt	Carnobacterium	high	Twice within 3 month; mutiple locations; before production and during production	Metagenomic 16S	Some bacteria are from processing environment, while some are detected in raw meat samples	Yes	NA	https://doi.org/10.1128/AEM.02228-15
				Staphylococcus
				Leuconostoc
			sausage emusion	Enterococcus	high
				Brochotrix
				Carnobacterium
				Leuconostoc
				Lactobacillus
11	Denmark, Europe	meat slaughterhouse plant, denmark	Wall	Arthrobacter	low	One time in winter	Metagenomic 16S	Processing environment	Yes	Biofilm; Food production; Interspecific interactions; Synergy; Bacterial consortia	https://doi.org/10.1016/j.fm.2015.04.008
				Kocuria
				Rothia
				Acinetobacter
				Brevundimonas
				Pseudomonas
				Staphylococcus
				Chryseobacterium
				Sphingobacterium
				Psychrobacter
			cleaned meat chopper	Kocuria	high
				Rothia
			used cutting board	Pseudomonas	high
				Psychrobacter
				Shewanella
				Stenotrophomonas
				Brochothrix
				Chryseobacterium
				Sphingobacterium
				Brevundimonas
			air	Arthrobacter	low
				Rhodococcus
				Acinetobacter
				Aeromonas
				Enhydrobacter
				Pseudomonas
				Psychrobacter
				Brochothrix
				Staphylococcus
12	Italy, Europe	Beef slaughtering house, italy	slicing knife	Acinetobacter johnsonii	high	Twice within 1 week	Metagenomic 16S	Processing environment and examine the carcass microbiome	Yes	NA	doi:10.1371/journal.pone.0070222
				Acinetobacter
				Alicyclobacillus
				Carnobacterium
				Chryseobacterium
				Corynebacterium
				Flavobacterium
				Moraxellaceae
				Propionibacterium acnes
				Pseudomonas
				Psychrobacter
				Staphylococcus
				Streptococcus
			chopping board	Brochothrix thermothphata
				Flavobacteriaceae
				Lactobacillus helveticus
				Psychrobacter
				Staphylococcus
				Streptococcus
				Alicyclobacillus
			storage wall	Acinetobacter johnsonii	low
				Alicyclobacillus
				Brochothrix thermothphacta
				Chryseobacterium
				Corynebacterium
				Enterobacteriaceeae
				Lactobacillus helveticus
				Pseudomonas
				Psychrobacter
				Sphingobacteria
				Streptococcus
13	Norway, Europe	RTE_meat processing plants	conveyor belts -after sanitization	Pseudomonas	high	One time from two plants	Culture based and 16S	Processing environment	Yes	NA	https://doi.org/10.1128/AEM.01046-17
				Psychrobacter
				Acinetobacter
				Sphingomonas
				Rhodococcus
				Microbacterium
				Corynebacterium
				Kocuria
14	Austria, Europe	pig slaughterhouse _ Austrian	cooling chamber wall	Bacillus	low	One time at difffernt processing sites	Metagenomic 16S	Processing environment	Yes	NA	https://doi.org/10.1038/s41522-020-0136-z
			truck wall	Bacillus
				Psychrobacter
				Lactococcus
			spitting saw - clean	Bacillus	high
				Chryseobacterium
				Lactococcus
			polishing tunnel nozzles -dirty	Bacillus	high
				Chryseobacterium
				Streptococcus
				Psychrobacter
				Staphylococcus
				Moraxella
15	Austria, Europe	meat processing plant	coveryor belts	Anaerobacillus	high	One time at difffernt processing sites	Culture based and 16S	Processing environment	Yes	Listeria monocytogenes, meat processing, microbiome, spoilage, microbial communities	https://doi.org/10.3389/fmicb.2021.632935
				Pseudomonas
				Psychrobacter
				Acinetobacter
				Chryseobacterium
				Microbacterium
				Arthrobacter
				Staphylococcus
				Curvibacter
				Brochothrix
				Flavobacterium
				Comamonas
				Sphingomonas
				Soonwooa
				Janthinobacterium
			cooling chamber wall	Anaerobacillus	low
				Psychrobacter
				Chryseobacterium
				Microbacterium
				Flavobacterium
				Arthrobacter
				Sphingomonas
				Cutibacterium
				Bradyrhizobium
16	Italy, Europe	meat processing plant, italy	Knife	Streptococcus	high	Twice within three weeks	Metagenomic 16s	Processing environment	Yes	NA	https://doi.org/10.1128/AEM.00793-16
				Psychrobacter
				Pseudomonas
				Brochothrix
				Staphylococcus
				Acinetobacter
17	France, Europe	meat processing plant	floor	Pseudomonas	unknown	Mutiple visits	Culture based	Environmental sources or hygiene operation spreads the contamination	Yes	NA	doi: 10.4315/0362-028x-61.1.57.
				Enterobacter
				Flavobacterium
				Staphylococcus
				Kluyvera
18	Europe	Poultry slaughtering plants	Air - reception area	Corynebacterium	Low	20 times	Culture based	NA	No	NA	https://doi.org/10.1006/fmic.1997.0119
				Staphylococcus
				Flavobacterium
				Micrococcus
				Acinetobacter
				Bacillus
				Enterobacter
				Proteus
				Streptococcus
			Air - evisceration area	Staphylococcus
				Moraxella
				Micrococcus
				Acinetobacter
				Klebsiella
				Corynebacterium
				Vibrio
			Air - spray chilling room	Corynebacterium
				Acinetobacter
				Moraxella
				Pseudomonas
				Flavobacterium
				Brochothrix
				Micrococcus
				Aeromonas
				Enterobacter
				Leuconostoc
			Air - chilling room	Corynebacterium
				Acinetobacter
				Moraxella
				Micrococcus
				Alcaligenes
				Staphylococcus
				Bacillus
				Xanthomonas
				Aeromonas
19	Canada, North America	Beef processing plant	Conveyor belt - FCS	Pseudomonas	high	Each of three Wednesdays at bi-weekly intervals	Metagenomic 16s	Processing environment	Yes	Bacteria surviving sanitation; E. coli O157:H7; Salmonella; meat processing surfaces; biofilm; Pseudomonas	https://doi.org/10.3390/microorganisms11020421
				Acinetobacter
				Comamonas
				Janthinobacterium
				Bacteroides
				Flavobacterium
				Sphingomonas
				Psychrobacter
				Yersinia
			conveyor belts -NFCS	Pseudomonas	low
				Acinetobacter
				Pseudarcobacter
				Janthinobacterium
				Bacteroides
				Flavobacterium
				Stenotrophomonas
				Chryseobacterium
				Polymorphobacter
				Pseudochrobactrum
			roller	Pseudomonas	low
				Acinetobacter
				Janthinobacterium
				Bacteroides
				Flavobacterium
				Chryseobacterium
				Psychrobacter
				Burkholderia
20	Spain, Europe	Fish and seafood processing	Sewage channels	Listeria	High	One time in September	Metagenomic 16S	Processing environment	Yes	Listeria monocytogenes; BiofilmSurvey; Food safety	https://doi.org/10.1016/j.ijfoodmicro.2015.05.003
				Escherichia coli
				Staphylococcus
				Microbacterium
				Enterococcus
21	Europe	Salmon processing plant	conveyor belts -after sanitization	Listeria	high	One time from three different facilities	Culture based with 16s	Processing environment	Yes	Biofilm, disinfection, food processing,Listeria,Pseudomonas, Salmonella, sanitation	https://doi.org/10.1111/jam.13013
				Pseudomonas
				Stenotrophomonas
				Brochothrix
				Serratia
				Acinetobacter
				Rhodococcus
22	Iceland, Europe	Shrimp processing plant	cooking and peeling machine surface	Aeromonas	high	NA	Culture based	Processing environment	Yes	Seafood processing, hygienic design, biofilm, adherence, Listeria, stainless steel	https://hrcak.srce.hr/file/162696;
				Pseudomonas
23		Fish processing plant	portioning machine surface	Pseudomonas	high
				Shewanella
				Aeromonas
				Acinetobacter
				Enterobacteriaceae
			conveyor belts	Enterobacteriaceae	high
				Pseudomonas
				Acinetobacter
				Aeromonas
24	Norway, Europe	Salmon fillets processing plant - Norwegian	Coveyor belts/filleting machine	Pseudomonas	high	One time at difffernt processing sites	Culture based and 16S	Processing environment	Yes	Salmon fillets;Crosscontamination; Spoilage bacteria; Pseudomonas; Shewanella; Photobacterium	https://doi.org/10.1016/j.ijfoodmicro.2016.08.016
				Shewanella
				Serratia
				Yersinia
				Morganella
				Janthinobacterium
				Acinetobacter
				Aeromonas
				Carnobacterium
				Lactococcus
25	France, Europe	cold smoke salmon plant, France	under conveyor, inbetween filleting and salting room	Aeromonas	low	Four weeks per time	Metagenomic 16S	NA	Yes	Smoked salmon Processing plant Bacteria 16S rRNA gene Microbiota Food safety Food spoilage	https://doi.org/10.1016/j.fm.2020.103705
				Acinetobacter
				Pseudomonas
				Shewanella
				Chryseobacterium
				Comamonas
				Flavobacterium
26	Norway, Europe	Salmon processing plant - norway	coveyor - slaughter -after sanitization	Pseudomonas	high	Thirteen times within 5 years	Culture based and 16S(nanopore)	Processing environment	Yes	Bacterial community; Species-level identification; ON-Rep-seq; Food processing environment; Food safety; Food spoilage	https://doi.org/10.1016/j.fm.2022.104138
				Shewanella
				Flavobacterium
				Aeromonas
				Psychrobacter
				Chryseobacterium
				Janthinobacterium
				Pseudoalteromonas
				Aliivibrio
			cutter knife	Pseudomonas	high
				Serratia
				Acinetobacter
			fillet turner	Acinetobacter	high
				Pseudomonas
				Pedobacter
				Serratia
				Rhodococcus
				Rahnella
			gutting suction	Aeromonas	high
				Chryseobacterium
				Glutamicibacter
				Pseudoalteromonas
				Pseudomonas
				Stenotrophomonas
27	China, Asia	fresh-cut vegetables	coveyor -cutting	Pseudomonas	high	One time	Metagenomic 16s	Processing environment	Yes	Fresh-cut vegetables, Environmental surface, Bacterial community, High-throughput sequencing, Pseudomonas	https://doi.org/10.1016/j.foodres.2022.111075
				Acinetobacter
				Devosia
				Flavobacterium
				Comamonas
			trolley -cutting	Pseudomonas	low
				Comamonas
				Acinetobacter
				Devosia
				Pedobacter
				Flavobacterium
				Arthrobacter
			drain -cutting	Janthinobacterium	high
				Pseudomonas
				Serratia
				Sphingobacterium
				Tissierella
			trimming table - sorting	Pseudomonas	high
				Acinetobacter
				Comamonas
				Devosia
				Pedobacter
				Flavobacterium
			Trolley - disinfection and cleaning area	Pseudomonas	low
				Janthinobacterium
				Comamonas
				Chryseobacterium
				Serratia
				Tissierella
				Rhodoferax
28	USA, North America	Fresh-Cut Produce Processing Plants -USA	floor	Burkholderia	unknown	Mutiple visits	Metagenomic 16S	Processing environment	Yes	NA	https://doi.org/10.4315/0362-028X.JFP-12-433
				Curtobacterium
				Enterobacter
				Flavobacterium
				Raoultella
			Peerler brush	Acinetobacter	high
				Chryseobacterium
				Corynebacterium
				Enterobacter
				Klebsiella
				Microbacterium
				Pseudomonas
				Rahnella
				Stenotrophomonas
			knife handle	Staphylococcus	low
				Rhizobium
				Ralstonia
				Pseudomonas
				Paenibacillus
				Arthrobacter
				Bacillus
29	USA, North America	Fresh-Cut Produce Processing Plants -USA	Cement floor	Cupriavidus	unknown	Twice within 4 month; late winter and early summer	Metagenomic 16S	Environmental sources (because there is a second study on the micrbiome on spinach surface and different isolates were identified)	Yes	Fresh-cut processor, Zone 3 surface, 16S rRNA gene copy number; Residential microbiota	https://doi.org/10.1016/j.ijfoodmicro.2019.02.002
				Ralstonia
				Arthrobacter
				Pseudomonas
				Stenotrophomonas
				Planomicrobium
				Psychrobacter
			Mezzanine floor (MF)	Cupriavidus	unknown
				Pseudomonas
				Ralstonia
				Arthrobacter
				Stenotrophomonas
			Drain covers (DC)	Cupriavidus	high
				Pseudomonas
				Ralstonia
				Bacillus
				Arthrobacter
			Entrance doors (dr)	Cupriavidus	low
				Pseudomonas
				Ralstonia
				Psychrobacter
				Devosia
				Stenotrophomonas
				Arthrobacter
				Pseudomonas
			Walls	Cupriavidus	low
				Ralstonia
				Arthrobacter
				Stenotrophomonas
				Pedobacter
30	USA, North America	Tree fruit processing plants	floor	Flavobacteriaceae	unknown	One time from three different facilities	Metagenomic 16S	Processing environment	Yes	Listeria monocytogenes, Microbiota, Mycobiota, Fruit, Built food processing environment	https://doi.org/10.1186/s40168-019-0726-2
				Moraxellaceae
				Weeksellaceae
				Pseudomonadaceae
				Xanthomonadaceae
				Burkholderiaceae
31	China, Asia	fresh-cut vegetables processing facility	conveyor belts	Bacillus	high	One time in december	Cutlure based and 16S	Processing environment	Yes	NA	DOI: 10.1039/d0ra09325d
				Cellulosimicrobium
				Microbacterium
				Serratia
32	Austria, Europe	cheese processing plant	floor drain - cooling chamber	Pseudomonas mucidolens	high	One time	Metagenomic 16S	Processing environment	Yes	Drain water; Drain biofilm; Floor drain; 16S rRNA gene pyrosequencing; Bacteria; Listeria monocytogenes	doi: 10.1016/j.ijfoodmicro.2016.02.004.
				Lactococcus lactis
				Pseudomonas fragi
				Acetobacter tropicalis
			floor drain - cuttign area	Leuconostoc citreum
				Pseudomonas mucidolens
				Lactococcus lactis
				Leuconostoc mesenteroides
				Serratia proteamaculans
				Halomonas hamiltonii
				Yersina massiliensis
			drain- washing area	Leuconostoc citreum
				Pseudomonas mucidolens
				Lactococcus lactis
				Acetobacter tropicalis
				Janthinobacterium Iividum
				Gluconobacter oxydans
				Liquorilactobacillus nagelii
				Leuconostoc mesenteroides
				Lactiplantibacillus pentosus
				Asaia spathodeae
				Klebsiella pheumoniae
			drain - processing area	Pseudomonas mucidolens
				Chryseobacterium ureliyticum
				Janthinobacterium Iividum
				Comamonas jiangduensis
				Flavobacterium resistens
				Acinetobacter baumanni
				Pseudomonas vancouverensis
33	Austria, Europe	cheese processing plant	curd room - floor drain	Lactococcus	high	One sampling day	Metagenomic 16S	Processing environment	Yes	NA	https://doi.org/10.1128/AEM.00934-13
				Brevibacterium
				Staphylococcus
				Acinetobacter
				Pseudomonas
				Corynebacterium
				Flavobacterium
				Shewanella
				Enterobacteriaceae
			brining tank - scooping room	Pseudoalteromonas	high
				Lactococcus
				Brevibacterium
				Staphylococcus
				Acinetobacter
				Lactobacillus
				Pseudomonas
				Corynebacterium
			packing area screens	Pseudoalteromonas	low
				Psychrobacter
				Brevibacterium
				Staphylococcus
				Brevundimonas
				Lactobacillus
				Corynebacterium
				Flavobacterium
				Shewanella
34	Italy, Europe	cheese processing plant	knife	Staphylococcus	high	NA	Metagenomic 16S	Processing environment	Yes	House microbiota, Rind and core cheese microbiotas, 16S rRNA targeted metagenomics Streptococcus thermophilus, Caciocavallo Pugliese, Caciotta	https://doi.org/10.1016/j.fm.2015.10.008
				Streptococcus
				Kocuria
				Sphingomonas
			brine tank	Chromohalobacter	high
				Pseudoalteromonas
				Enterococcus
				Lactobacillus helveticus
				Lactococcus
				Macrococcus
				Streptococcus
			wall	Streptococcus	low
				Staphylococcus
				Enterobacter
			floor	Brevibacterium	unknown
				Propionibacterium
				Companilactobacillus paralimentarius
				Staphylococcus
				Streptococcus
				Chromohalobacter
				Enterobacter
35	Italy, Europe	cheese processing plant	choper - curd shredding machine	Streptococcus	high	Twice in 3 weeks	Metagenomic 16S	Processing environment	Yes	NA	http://dx.doi.org/10.1128/AEM.02294-15
				Pseudomonas
				Acinetobacter
				Chryseobacterium
				Lactobacillus delbrueckii
				Stenotrophomonas
			knife curd	Streptococcus	high
				Pseudomonas
				Acinetobacter
				Psychrobacter
				Sphingobacterium
				Lactobacillus delbrueckii
			brine tank	Streptococcus	high
				Pseudomonas
				Psychrobacter
				Acinetobacter
				Aeromonas
36	Austria, Europe	cheese processing plant	floor drain	Lactobacillus delbrueckii	high	One time, three different rooms	Metagenomic 16S	Processing environment	yes	Floor-drain, Drain water, Drain biofilm, 16S rRNA gene pyrosequencing, 18S rRNA gene	https://doi.org/10.1016/j.foodcont.2016.05.057
				Streptococcus
				Pseudoalteromonas
				Aeromonas
				Comamonas
				Citrobacter
				Pseudomonas
				Raoultella
				Arthrobacter
				Arcobacter
				Vibrio
				Cobetia
37	Canada, North America	cheese processing plant	aging shelf	Acinetobacter	high	twice	Metagenomic 16S	Raw matertial and processing environment	No	Artisanal cheese, Dairy farm, Microbiota, 16S rRNA sequencing	https://doi.org/10.1016/j.fm.2019.04.002
				Acidovorax
				Brevibacterium
				Lactobacillus
				Lactococcus
				Pseudomonas
				Psychrobacter
				Staphylococcus
				Stenotrophomonas
				Streptococcus
			packaging film	Brevibacterium	low
				Lactobacillus
				Lactococcus
				Staphylococcus
				Streptococcus
37	Italy, Europe	cheese processing plant	wooden aging shelves	Brevibacterium	high	once	Culture based and metagenoic 16s	Processing environment	Yes	Smear-ripened cheese, Wooden shelves, Microbiota, Ozone-treatment, 454-Pyrosequencing	doi: 10.1016/j.fm.2016.10.018. Epub 2016 Oct 10.
				Corynebacterium
				Microbacterium
				Aequorivita
				Sphingobacterium
				Staphylococcus
				Halomonas
				Psychrobacter
				Pseudomonas
				Alkalibacterium
				Facklamia
				Salegentibacter
				Propionibacterium
				Arthrobacter
				Leucobacter
				Brachybacterium
39	Austria, Europe	cheese processing plant	wooden aging shelves	Sphingobacterium	high	once in two different rooms	Metagenomic 16S	Processing environment	No	Cheese rind, Bacteria, 16S rRNA gene cloning, Vorarlberger Bergkäse	https://doi.org/10.1016/j.ijfoodmicro.2017.12.025
				Leucobacter
				Corynebacterium
				Psychrobacter
				Pseudomonas
				Staphylococcus
				Brevibacterium
				Halomonas
				Comamonas
			floor	Psychroflexus	unknown
				Pseudomonas
				Staphylococcus
				Halomonas
				Oceanisphaera
				Psychrobacter
				Corynebacterium
				Pseudoalteromonas
				Brevibacterium
			walls	Oceanisphaera	low
				Pseudoalteromonas
				Brevibacterium
				Halomonas
				Pseudomonas
				Psychroflexus
				Staphylococcus
			racks	Oceanisphaera	low
				Brevibacterium
				Halomonas
				Leucobacter
				Corynebacterium
				Brevibacterium
				Sphingobacterium
